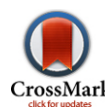

# Increased Risk of Dementia in Patients Exposed to Nitrogen Dioxide and Carbon Monoxide: A Population-Based Retrospective Cohort Study

Kuang-Hsi Chang<sup>1,2</sup>, Mei-Yin Chang<sup>3</sup>, Chih-Hsin Muo<sup>4</sup>, Trong-Neng Wu<sup>1</sup>, Chiu-Ying Chen<sup>1</sup>, Chia-Hung Kao<sup>5,6\*</sup>

**1** Department of Public Health, China Medical University, Taichung, Taiwan, **2** Department of Medical Research, Taichung Veterans General Hospital, Taichung, Taiwan, **3** Department of Medical Laboratory Science and Biotechnology, School of Medical and Health Sciences, Fooyin University, Kaohsiung, Taiwan, **4** Management Office for Health Data, China Medical University Hospital, Taichung, Taiwan, **5** Graduate Institute of Clinical Medical Science, College of Medicine, China Medical University, Taiwan, **6** Department of Nuclear Medicine and PET Center, China Medical University Hospital, Taichung, Taiwan

## Abstract

**Background:** The air pollution caused by vehicular emissions is associated with cognitive decline. However, the associations between the levels of nitrogen dioxide (NO<sub>2</sub>) and carbon monoxide (CO) exposure and dementia remain poorly defined and have been addressed in only a few previous studies.

**Materials and Methods:** In this study, we obtained data on 29547 people from the National Health Insurance Research Database (NHIRD) of Taiwan, including data on 1720 patients diagnosed with dementia between 2000 and 2010, and we evaluated the risk of dementia among four levels of air pollutant. Detailed data on daily air pollution were available from January 1, 1998 to December 31, 2010. Yearly average concentrations of pollutants were calculated from the baseline to the date of dementia occurrence, withdrawal of patients, or the end of the study, and these data were categorized into quartiles, with Q1 being the lowest level and Q4 being the highest.

**Results:** In the case of NO<sub>2</sub>, the adjusted hazard ratios (HRs) of dementia for all participants in Q2, Q3, and Q4 compared to Q1 were 1.10 (95% confidence interval (CI), 0.96–1.26), 1.01 (95% CI, 0.87–1.17), and 1.54 (95% CI, 1.34–1.77), and in the case of CO, the adjusted HRs were 1.07 (95% CI, 0.92–1.25), 1.37 (95% CI, 1.19–1.58), and 1.61 (95% CI, 1.39–1.85).

**Conclusion:** The results of this large retrospective, population-based study indicate that exposure to NO<sub>2</sub> and CO is associated with an increased risk of dementia in the Taiwanese population.

**Citation:** Chang K-H, Chang M-Y, Muo C-H, Wu T-N, Chen C-Y, et al. (2014) Increased Risk of Dementia in Patients Exposed to Nitrogen Dioxide and Carbon Monoxide: A Population-Based Retrospective Cohort Study. PLoS ONE 9(8): e103078. doi:10.1371/journal.pone.0103078

**Editor:** Gianluigi Forloni, "Mario Negri" Institute for Pharmacological Research, Italy

**Received:** March 15, 2014; **Accepted:** June 25, 2014; **Published:** August 12, 2014

**Copyright:** © 2014 Chang et al. This is an open-access article distributed under the terms of the Creative Commons Attribution License, which permits unrestricted use, distribution, and reproduction in any medium, provided the original author and source are credited.

**Data Availability:** The authors confirm that all data underlying the findings are fully available without restriction. All data and related metadata are deposited in an appropriate public repository: The study population's data were from Taiwan NHIRD ([http://w3.nhri.org.tw/nhird//date\\_01.html](http://w3.nhri.org.tw/nhird//date_01.html)) are maintained by Taiwan National Health Research Institutes (<http://nhird.nhri.org.tw/>) [27]. The National Health Research Institutes (NHRI) is a non-profit foundation established by the government. Air quality data were from Taiwan Air Quality Monitoring Network (<http://taqm.epa.gov.tw/taqm/en/PsiMap.aspx>) in Taiwan Environmental Protection Administration (<http://www.epa.gov.tw/>).

**Funding:** The study was supported in part by China Medical University (CMU102-BC-2), Taiwan Ministry of Health and Welfare Clinical Trial and Research Center of Excellence (MOHW103-TDU-B-212-113002), Taiwan Ministry of Health and Welfare Cancer Research Center for Excellence (MOHW103-TD-B-111-03), and International Research-Intensive Centers of Excellence in Taiwan (I-RiCE) (NSC101-2911-I-002-303). The funders had no role in study design, data collection and analysis, decision to publish, or preparation of the manuscript.

**Competing Interests:** The authors have declared that no competing interests exist.

\* Email: d10040@mail.cmuh.org.tw

## Introduction

Ambient air pollution includes solid and gaseous pollutants [1,2]. Most of the studies that have investigated the effects of pollutants on cognitive functions have examined the influence of solid pollutants [3–8]. However, exposure to ambient gaseous pollutants such as nitrogen dioxide (NO<sub>2</sub>) is known to increase the risk of cerebrovascular and neurodegenerative diseases and ischemic stroke [9–12]. Cerebrovascular disease is the principal contributor to dementia [13,14], and Alzheimer's disease (AD) is the most common neurodegenerative disease. Moreover, a population-base study reported that dementia often developed

after the occurrence of an ischemic stroke [15]. Several previous studies have suggested negative associations between NO<sub>2</sub> exposure and cognitive development in children, including preschool children [16–18], and animal studies have indicated that NO<sub>2</sub> exposure inhibits the recovery of nerve function after a stroke [19,20]. In addition, one animal study reported that nitration can induce beta-amyloid aggregation and plaque formation [21]; beta-amyloid aggregation is a pathologic hallmark of AD. However, a literature search indicated that only a few studies have been conducted to address the link between NO<sub>2</sub> exposure and cognitive function in adults. In a recent study

conducted on 1496 middle-aged people living in Los Angeles, no statistically significant correlation was detected between the level of NO<sub>2</sub> exposure and cognitive functions [22]. Therefore, we conducted a retrospective cohort study to determine the association between NO<sub>2</sub> and dementia risk. Furthermore, in this study, we evaluated the influence of carbon monoxide (CO), because acute CO poisoning may cause headache, nausea, malaise, and fatigue [23], and chronic CO exposure has been linked to depression, confusion, memory loss, and cognitive decline [24,25]. Comparison between this study with other environmental study of Taiwan NHIRD, the main difference is the residential area definition. In previous studies, the residential area is as the insurance area [26]. In present study, we defined the residential areas as the location of clinics which subjects sought treatment for acute upper respiratory infections.

## Materials and Methods

### Data sources and study population

In March 1995, the Taiwan National Health Insurance (NHI) program, which is a single-payer, compulsory social insurance system that has provided insurance coverage to almost every citizen in Taiwan, was established. The NHI covered approximately 99% of the 22.96 million citizens in Taiwan at the end of 2007 [27]. To protect patient privacy, the data on patient identities are encrypted in the National Health Insurance Research Database (NHIRD), and the database is accessible to researchers and the public in Taiwan. In this study, we used a subset of the NHIRD data containing comprehensive health-care data, including files on ambulatory care claims, inpatient claims, and prescriptions received by 1000000 people who were randomly selected from all insured beneficiaries. These data files can be linked through an encrypted but unique personal identification number and, thus, provide a longitudinal medical history of each patient. The health status of each person was identified according to the International Classification of Disease, Ninth Revision, Clinical Modification (ICD-9-CM).

### Exposure assessment

Across Taiwan, 74 ambient air quality monitoring stations are located based on population density. Air quality data are maintained by Taiwan Environmental Protection Administration. [28]. A database containing daily NO<sub>2</sub> and CO concentrations measured at the monitoring stations was available for the period from January 1, 1998 to December 31, 2010. The people included in this study were assigned pollutant-exposure values based on the data obtained from the monitoring station present in the residential district in which the clinic where the people most frequently sought treatment for acute upper respiratory infection was located (ICD-9-CM Code 460). Yearly average concentrations of pollutants were calculated from the baseline to the date of dementia occurrence, the withdrawal of patients, or the end of the study period, and the data were categorized into quartiles.

### Study patients

We identified 29547 people who were aged 50 years or older and for whom estimable air pollution data were available, but who did not present a history of head injury (ICD-9-CM Codes 800.804, 850.854.1, 310.2, and 959.01), stroke (ICD-9-CM Codes 430–438), or dementia (ICD-9-CM Codes 290.0–290.4, 294.1, and 331.0) before 2000.

## Data Availability Statement

All data and related metadata are deposited in an appropriate public repository: The study population's data were from Taiwan NHIRD ([http://w3.nhri.org.tw/nhird//date\\_01.html](http://w3.nhri.org.tw/nhird//date_01.html)) are maintained by Taiwan National Health Research Institutes (<http://nhird.nhri.org.tw/>) [27]. The National Health Research Institutes (NHRI) is a non-profit foundation established by the government. Air quality data were from Taiwan Air Quality Monitoring Network (<http://taqm.epa.gov.tw/taqm/en/PsiMap.aspx>) in Taiwan Environmental Protection Administration (<http://www.epa.gov.tw/>) [28].

## Ethics statement

Because identification numbers of patients had been encrypted, patient consent was not required for this study. This study was approved by the Research Ethic Committee at China Medical University (CMU-REC-101-012). The committee waived the requirement for consent.

## Statistical analysis

We used  $\chi^2$  tests to examine the distributions of sex, monthly income (New Taiwan Dollar <14 400, 14 400–18 300, 18 301–21 000, and >21 000), diabetes (DM, ICD-9-CM Code 250), ischemic heart disease (IHD, ICD-9-CM Codes 410–414), hypertension (HT, ICD-9-CM Codes 401–405), chronic obstructive pulmonary disease (COPD, ICD-9-CM Codes 490–496), alcoholism (ICD-9-CM Codes 303.305.0 and V113), and the quartiles of NO<sub>2</sub> concentration (ppb; <6652.3, 6652.3–8349.0, 8349.1–9825.5, >9825.5) and CO concentration (ppm; <196.2, 196.2–241.6, 241.7–296.9, >296.9). A one-way analysis of variance (ANOVA) was performed to compare the age among the quartiles of NO<sub>2</sub> and CO concentrations. We calculated the incidence density rates of dementia in person-years in each quarter stratified according to sex. The incidence rate ratio (IRR) was estimated using a Poisson regression. Univariate and multivariate Cox proportional hazard regression analyses were performed to calculate the hazard ratios (HRs) and 95% confidence intervals (CIs) of the risk of dementia in association with pollutant levels. Multiple models were tested by controlling for age, sex, monthly income, DM, HT, IHD, COPD, alcoholism, and urbanization. Plots of the Kaplan-Meier analysis were used to determine the probability of people remaining without dementia, and the log-rank test was used to evaluate the differences among quartiles of pollutant concentrations. All analyses were performed using SAS 9.2 software (SAS Institute Inc., Cary, NC, USA), and the Kaplan-Meier survival curve was plotted using the Statistical Package for the Social Sciences (Version 15.1; SPSS Inc, Chicago, IL, USA). All tests were considered statistically significant when two-tailed *P* values were <.05.

## Results

We obtained a total of 29547 and 29537 data on daily NO<sub>2</sub> and CO exposure, respectively. Dementia was not present at the baseline (2000), and 1720 people developed dementia after follow-up (yearly CO data were available for 1718 people). We categorized the NO<sub>2</sub> and CO levels into quartiles, with Q1 being the lowest level and Q4 being the highest. The people included in this study had a mean age of 61.4 years (SD 8.5 y). In both the NO<sub>2</sub> and CO groups, the highest level of the quartiles was associated with the people being slightly younger, more frequently earning a high monthly income, and living in a highly urbanized residential area, but less frequently exhibiting IHD and COPD compared with other quartiles (Tables 1 and 2). Table 3 shows the

associations between the gaseous pollutant levels and the risk of dementia. Among the quartiles Q1, Q2, Q3, and Q4 of NO<sub>2</sub> in all patients, the IRRs in Q2, Q3, and Q4 compared with that in Q1 were 1.05, 0.90, and 1.35, and the adjusted HRs of dementia were 1.10 (95% CI, 0.96–1.26), 1.01 (95% CI, 0.87–1.17), and 1.54 (95% CI, 1.34–1.77), respectively. Among men, we determined that the IRRs in Q2, Q3, and Q4 compared with that in Q1 were 1.08, 0.79, and 1.28, and the adjusted HRs were 1.16 (95% CI, 0.95–1.43), 0.89 (95% CI, 0.71–1.11), and 1.52 (95% CI, 1.23–1.88), respectively. Among women, the IRRs in Q2, Q3, and Q4 compared with that in Q1 were 1.05, 1.11, and 1.56, and the adjusted HRs were 1.05 (95% CI, 0.87–1.27), 1.11 (95% CI, 0.92–1.35), and 1.56 (95% CI, 1.29–1.87), respectively. When the data on sex were stratified or merged for analysis, statistically significant correlations of IRRs and adjusted HRs were measured in Q4 compared with those in Q1.

Among the quartiles of CO concentration, the IRRs in Q2, Q3, and Q4 compared with that in Q1 were 0.96, 1.23, and 1.36, and the adjusted HRs were 1.07 (95% CI, 0.92–1.25), 1.37 (95% CI, 1.19–1.58), and 1.61 (95% CI, 1.39–1.85), respectively, in all people included in the study. Among men, the IRRs in Q2, Q3, and Q4 compared with that in Q1 were 0.97, 1.18, and 1.28, and the adjusted HRs were 1.16 (95% CI, 0.93–1.45), 1.28 (95% CI, 1.04–1.58), and 1.57 (95% CI, 1.26–1.94), respectively. Among women, the IRRs in Q2, Q3, and Q4 compared with that in Q1 were 0.95, 1.28, and 1.43, and the adjusted HRs were 1.01 (95% CI, 0.82–1.24), 1.46 (95% CI, 1.21–1.77), and 1.64 (95% CI, 1.36–1.98), respectively. A clear trend that was detected was an increase in the risk of dementia as CO exposure increased. Figures 1 and 2 show the Kaplan-Meier curves of freedom that were calculated for dementia and are separated according to pollutant level. Statistically significant differences in the occurrence of dementia were observed among the quartiles of NO<sub>2</sub> and CO concentrations (log-rank test,  $P < .001$ ).

## Discussion

The major finding of previous animal study was that nitration was highly correlated with beta-amyloid aggregation and plaque formation, and beta-amyloid aggregation is a pathologic hallmark of AD [21]. Another animal study indicated that NO<sub>2</sub> expose can exacerbate the ultra structural impairment of synapses in stroke rats, and induce neuronal damage in healthy rats [29]. The apolipoprotein E (APOE) e4 allele was a well know genetic risk factor or AD, and a randomized clinical trial has found CO poisoning can induce APOE e4 carriers suffer greater morbidity [30].

The major finding of our study was that increased exposure to NO<sub>2</sub> (Q4) is associated with an enhanced risk of dementia in men and women. The probability of dementia occurrence was increased by 52%–56% in Q4 compared with Q1. A similar trend was observed in the CO group, and the results collectively showed that increasing levels of the 2 pollutants increased the risk of dementia in a dose-dependent manner.

This study was a national population-based investigation on ambient air pollution and dementia. Therefore, collecting individual exposure data was not feasible. To obtain exposure data associated with study patients, previous studies have identified the residential areas of patients by employing a GIS-based system. To protect the privacy of patients, the NHIRD does not provide patients' addresses. Therefore, we identified the residential areas of the patients based on the location of the clinic at which the patients most frequently sought treatment for acute upper respiratory tract infection. In the United States, upper respiratory

tract infections are the most common type of infectious disease, and each adult experiences approximately 3 respiratory infections annually [31]. Identifying residential areas in the accessible medical resources, as we did in this study, is more accurate than listing patients according to insurance area [32,33].

Previous studies have suggested that smoking and drinking alcohol are highly correlated with the risk of AD [34–40]. Because of the limitations of the NHIRD, we could not obtain data on the smoking or drinking status of the patients. Therefore, we performed multivariate analysis with COPD and alcoholism adjusted in accordance with previous studies that indicated that smoking is a major causative factor in the development of COPD, and in which alcoholism was diagnosed based on drinking patterns and the attitudes of patients [41–43]. In Taiwan, women are not encouraged to smoke or drink alcohol, as reflected in the low prevalence of these behaviors among women (3% and 1%, respectively) [44,45]. We were able to overcome this limitation by stratifying and adjusting the data according to sex [46].

We adjusted for urbanization in the multivariate analysis. The level of urbanization was determined according to population density (number of people/km<sup>2</sup>), the population ratio of people with a college-level education or higher, the population ratio of people aged over 65 years, the population ratio of agricultural workers, and the number of physicians per 100000 people [47]. The 359 communities in Taiwan were classified into 7 groups: highly urbanized area, moderately urbanized area, boomtown, general town, aging town, agricultural town, and remote town. This classification method has been used in several studies [48–50].

In addition, we obtained results contrasting those related to dementia, as shown in Tables 1 and 2: the frequency of IHD and COPD were low at the highest level of the pollutants. These results agree with the explanation provided by previous studies suggesting that patients who are highly educated and earn a high monthly income live in areas where the level of air pollutants is high [6,22].

The strengths of this study are the following. First, this study was based on a long follow-up period, which allowed the possible occurrence of dementia to be assessed. Second, Taiwan launched a national health insurance (NHI) in 1995, operated by a single-buyer, the government. All insurance claims should be scrutinized by medical reimbursement specialists and peer review. The diagnoses of dementia were based on the ICD-9 code determined by qualified clinical neurology physicians under strict audit in the reimbursement process. Therefore the diagnoses and codes for dementia should be accurate and reliable. Third, this study was conducted using a large population derived from the NHIRD. In Taiwan, the government is the only compulsory social insurance provider; approximately 99% of the 23.74 million citizens of Taiwan are enrolled in the NHI program. Because this was a nationwide study, we considered urbanized towns throughout Taiwan. Lastly, in this study, cerebrovascular and cardiovascular diseases were considered and the association between pollutants and dementia was evaluated. We excluded subjects with cardiovascular before the index date in this study because cardiovascular was a widely known predictor for dementia. IHD increased 27% risk for dementia in both model 1 and model 2. (Table S1).

Certain limitations of this study should be considered. First, the evidence derived from a retrospective cohort study is generally lower in statistical quality than that obtained from randomized trials because, in such retrospective studies, potential biases exist that are related to the adjustment of confounding variables. Despite our meticulous study design and the measures adopted to control for confounding factors, bias resulting from unknown confounders may have affected our results. Second, all data in the

**Table 1.** Comparison of Baseline Characteristics among quartiles of NO<sub>2</sub> yearly average.

|                       | Quartiles of NO <sub>2</sub> yearly average |               |               |               | P    | Total (n = 29547) |      |      |        |                     |      |     |
|-----------------------|---------------------------------------------|---------------|---------------|---------------|------|-------------------|------|------|--------|---------------------|------|-----|
|                       | Q1 (n = 7349)                               | Q2 (n = 7425) | Q3 (n = 7572) | Q4 (n = 7201) |      |                   |      |      |        |                     |      |     |
| Dementia              | 406                                         | 5.5           | 425           | 5.7           | 374  | 4.9               | 515  | 7.2  | <0.001 | 1720                | 5.8  |     |
| Age (mean, SD)        | 61.8                                        | 8.4           | 61.4          | 8.5           | 61.0 | 8.4               | 61.4 | 61.4 | 8.8    | <0.001 <sup>†</sup> | 61.4 | 8.5 |
| Male                  | 3365                                        | 45.8          | 3469          | 46.7          | 3474 | 45.9              | 3298 | 45.8 | 0.611  | 13606               | 46.0 |     |
| Monthly income        |                                             |               |               |               |      |                   |      |      |        |                     |      |     |
| <14400                | 1481                                        | 20.2          | 1814          | 24.4          | 2004 | 26.5              | 1991 | 27.7 | <0.001 | 7290                | 24.7 |     |
| 14400–18300           | 1054                                        | 14.3          | 1324          | 17.8          | 1511 | 20.0              | 1480 | 20.6 |        | 5369                | 18.2 |     |
| 18301–21000           | 3255                                        | 44.3          | 2399          | 32.3          | 1992 | 26.3              | 1785 | 24.8 |        | 9431                | 31.9 |     |
| >21000                | 1559                                        | 21.2          | 1887          | 25.4          | 2062 | 27.2              | 1944 | 27.0 |        | 7452                | 25.2 |     |
| DM                    | 845                                         | 11.5          | 837           | 11.3          | 916  | 12.1              | 850  | 11.8 | 0.421  | 3448                | 11.7 |     |
| IHD                   | 1347                                        | 18.3          | 1354          | 18.2          | 1295 | 17.1              | 1222 | 17.0 | 0.047  | 5218                | 17.7 |     |
| HT                    | 2899                                        | 39.4          | 2906          | 39.1          | 2889 | 38.2              | 2785 | 38.7 | 0.391  | 11479               | 38.8 |     |
| COPD                  | 2612                                        | 35.5          | 2608          | 35.1          | 2579 | 34.1              | 2376 | 33.0 | 0.005  | 10175               | 34.4 |     |
| Alcoholism            | 19                                          | 0.3           | 19            | 0.3           | 22   | 0.3               | 10   | 0.1  | 0.250  | 70                  | 0.2  |     |
| Urbanization          |                                             |               |               |               |      |                   |      |      |        |                     |      |     |
| Highly urbanization   | 1330                                        | 18.1          | 1668          | 22.5          | 2503 | 33.1              | 3720 | 51.7 | <0.001 | 9221                | 31.2 |     |
| Moderate urbanization | 2157                                        | 29.4          | 2782          | 37.5          | 2908 | 38.4              | 1828 | 25.4 |        | 9675                | 32.7 |     |
| Boombtown             | 907                                         | 12.3          | 986           | 13.3          | 1485 | 19.6              | 1126 | 15.6 |        | 4504                | 15.2 |     |
| General town          | 1692                                        | 23.0          | 1160          | 15.6          | 412  | 5.4               | 298  | 4.1  |        | 3562                | 12.1 |     |
| Aging town            | 304                                         | 4.1           | 56            | 0.8           | 68   | 0.9               | 72   | 1.0  |        | 500                 | 1.7  |     |
| Agricultural town     | 658                                         | 9.0           | 321           | 4.3           | 111  | 1.5               | 88   | 1.2  |        | 1178                | 4.0  |     |
| Remote town           | 301                                         | 4.1           | 452           | 6.1           | 85   | 1.1               | 69   | 1.0  |        | 907                 | 3.1  |     |

Chi-square test;

<sup>†</sup>T-test;

doi:10.1371/journal.pone.0103078.t001

**Table 2.** Comparison of Baseline Characteristics among quartiles of CO yearly average.

|                       | Quartiles of CO yearly average |               |               |               | P    | Total (n = 29537) |      |      |         |       |      |
|-----------------------|--------------------------------|---------------|---------------|---------------|------|-------------------|------|------|---------|-------|------|
|                       | Q1 (n = 7565)                  | Q2 (n = 6428) | Q3 (n = 7681) | Q4 (n = 7863) |      |                   |      |      |         |       |      |
| Dementia              | 391                            | 5.2           | 321           | 5.0           | 476  | 6.2               | 530  | 6.7  | <0.001  | 1718  | 5.8  |
| Age (mean, SD)        | 61.8                           | 8.3           | 61.1          | 8.3           | 61.4 | 8.6               | 61.3 | 8.8  | <0.001† | 61.4  | 8.5  |
| Male                  | 3532                           | 46.7          | 2882          | 44.8          | 3587 | 46.7              | 3597 | 45.7 | 0.084   | 13598 | 46.0 |
| Monthly income        |                                |               |               |               |      |                   |      |      |         |       |      |
| <14400                | 1477                           | 19.5          | 1477          | 23.0          | 2190 | 28.5              | 2144 | 27.3 | <0.001  | 7288  | 24.7 |
| 14400–18300           | 1074                           | 14.2          | 1189          | 18.5          | 1513 | 19.7              | 1591 | 20.2 |         | 5367  | 18.2 |
| 18301–21000           | 3401                           | 45.0          | 2095          | 32.6          | 1887 | 24.6              | 2046 | 26.0 |         | 9429  | 31.9 |
| >21000                | 1613                           | 21.3          | 1667          | 25.9          | 2088 | 27.2              | 2080 | 26.5 |         | 7448  | 25.2 |
| DM                    | 862                            | 11.4          | 712           | 11.1          | 918  | 12.0              | 954  | 12.1 | 0.173   | 3446  | 11.7 |
| IHD                   | 1430                           | 18.9          | 1054          | 16.4          | 1394 | 18.1              | 1339 | 17.0 | <0.001  | 5217  | 17.7 |
| HT                    | 2980                           | 39.4          | 2455          | 38.2          | 3021 | 39.3              | 3017 | 38.4 | 0.306   | 11473 | 38.8 |
| COPD                  | 2785                           | 36.8          | 2189          | 34.1          | 2607 | 33.9              | 2587 | 32.9 | <0.001  | 10168 | 34.4 |
| Alcoholism            | 19                             | 0.3           | 15            | 0.2           | 24   | 0.3               | 12   | 0.2  | 0.232   | 70    | 0.2  |
| Urbanization          |                                |               |               |               |      |                   |      |      |         |       |      |
| Highly urbanization   | 912                            | 12.1          | 1697          | 26.4          | 2694 | 35.1              | 3918 | 49.8 | <0.001  | 9221  | 31.2 |
| Moderate urbanization | 2388                           | 31.6          | 2615          | 40.7          | 2323 | 30.2              | 2346 | 29.8 |         | 9672  | 32.7 |
| Boombtown             | 1084                           | 14.3          | 819           | 12.7          | 1576 | 20.5              | 1024 | 13.0 |         | 4503  | 15.2 |
| General town          | 1684                           | 22.3          | 772           | 12.0          | 781  | 10.2              | 322  | 4.1  |         | 3559  | 12.0 |
| Aging town            | 336                            | 4.4           | 22            | 0.3           | 65   | 0.8               | 74   | 0.9  |         | 497   | 1.7  |
| Agricultural town     | 699                            | 9.2           | 253           | 3.9           | 120  | 1.6               | 106  | 1.3  |         | 1178  | 4.0  |
| Remote town           | 462                            | 6.1           | 250           | 3.9           | 122  | 1.6               | 73   | 0.9  |         | 907   | 3.1  |

Chi-square test;

†T-test;

doi:10.1371/journal.pone.0103078.t002

**Table 3.** Comparisons of difference dementia incidences and associated hazard ratios among four levels of air pollutants by gender stratification.

|                 |        | Dementia | PY      | Incidence rate <sup>#</sup> | IRR* | 95%CI | aHR <sup>†</sup> | 95%CI |            |
|-----------------|--------|----------|---------|-----------------------------|------|-------|------------------|-------|------------|
| NO <sub>2</sub> | Total  |          |         | 5.38                        | 1.00 |       | 1.00             |       |            |
|                 |        | Q1       | 75461.4 |                             |      |       |                  |       |            |
|                 |        | Q2       | 75246.1 |                             | 5.65 | 1.05  | 0.92, 1.20       | 1.10  | 0.96, 1.26 |
|                 |        | Q3       | 77576.5 |                             | 4.82 | 0.90  | 0.78, 1.03       | 1.01  | 0.87, 1.17 |
|                 |        | Q4       | 71461.0 |                             | 7.21 | 1.35  | 1.18, 1.54       | 1.54  | 1.34, 1.77 |
|                 | Male   |          |         | 5.49                        | 1.00 |       | 1.00             |       |            |
|                 |        | Q1       | 33853.8 |                             |      |       |                  |       |            |
|                 |        | Q2       | 34587.2 |                             | 5.96 | 1.08  | 0.89, 1.32       | 1.16  | 0.95, 1.43 |
|                 |        | Q3       | 34973.3 |                             | 4.35 | 0.79  | 0.64, 0.98       | 0.89  | 0.71, 1.11 |
|                 |        | Q4       | 31976.0 |                             | 7.01 | 1.28  | 1.05, 1.56       | 1.52  | 1.23, 1.88 |
|                 | Female |          |         | 5.29                        | 1.00 |       | 1.00             |       |            |
|                 |        | Q1       | 41607.6 |                             |      |       |                  |       |            |
|                 |        | Q2       | 40658.9 |                             | 5.39 | 1.02  | 0.85, 1.23       | 1.05  | 0.87, 1.27 |
|                 |        | Q3       | 42603.2 |                             | 5.21 | 0.99  | 0.82, 1.19       | 1.11  | 0.92, 1.35 |
|                 |        | Q4       | 39485.0 |                             | 7.37 | 1.41  | 1.18, 1.67       | 1.56  | 1.29, 1.87 |
|                 | CO     | Total    |         |                             | 5.02 | 1.00  |                  | 1.00  |            |
|                 |        | Q1       | 77816.4 |                             | 4.83 | 0.96  | 0.83, 1.11       | 1.07  | 0.92, 1.25 |
|                 |        | Q2       | 66509.7 |                             | 6.16 | 1.23  | 1.08, 1.41       | 1.37  | 1.19, 1.58 |
|                 |        | Q3       | 77215.4 |                             | 6.78 | 1.36  | 1.19, 1.55       | 1.61  | 1.39, 1.85 |
|                 |        | Q4       | 78172.7 |                             | 5.10 | 1.00  |                  | 1.00  |            |
| Male            |        |          |         | 4.94                        | 0.97 |       | 1.00             |       |            |
|                 |        | Q1       | 35681.8 |                             |      |       |                  |       |            |
|                 |        | Q2       | 29334.5 |                             | 4.94 | 0.97  | 0.78, 1.20       | 1.16  | 0.93, 1.45 |
|                 |        | Q3       | 35371.7 |                             | 5.99 | 1.18  | 0.97, 1.44       | 1.28  | 1.04, 1.58 |
|                 |        | Q4       | 34977.3 |                             | 6.49 | 1.28  | 1.05, 1.55       | 1.57  | 1.26, 1.94 |
| Female          |        |          |         | 4.96                        | 1.00 |       | 1.00             |       |            |
|                 |        | Q1       | 42134.6 |                             |      |       |                  |       |            |
|                 |        | Q2       | 37175.2 |                             | 4.73 | 0.95  | 0.78, 1.16       | 1.01  | 0.82, 1.24 |
|                 |        | Q3       | 41843.8 |                             | 6.31 | 1.28  | 1.07, 1.54       | 1.46  | 1.21, 1.77 |
|                 |        | Q4       | 43195.4 |                             | 7.01 | 1.43  | 1.20, 1.70       | 1.64  | 1.36, 1.98 |

Incidence rate<sup>#</sup>, per 1,000 person-years;  
 IRR\*, incidence rate ratio;  
 Adjusted HR<sup>†</sup>: multiple analysis including age, sex, monthly income, DM, IHD, HT, COPD, alcoholism and urbanization.  
 doi:10.1371/journal.pone.0103078.t003

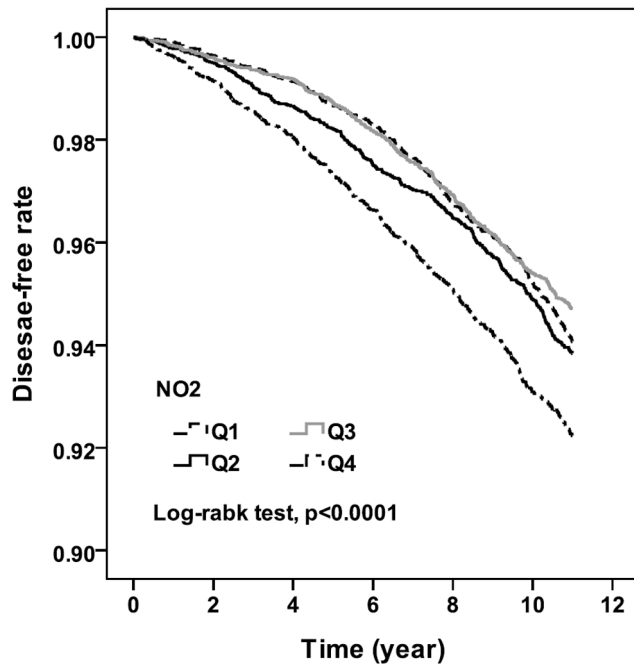

**Figure 1. Probability free of dementia among quartiles of yearly average concentration in NO<sub>2</sub>.**  
doi:10.1371/journal.pone.0103078.g001

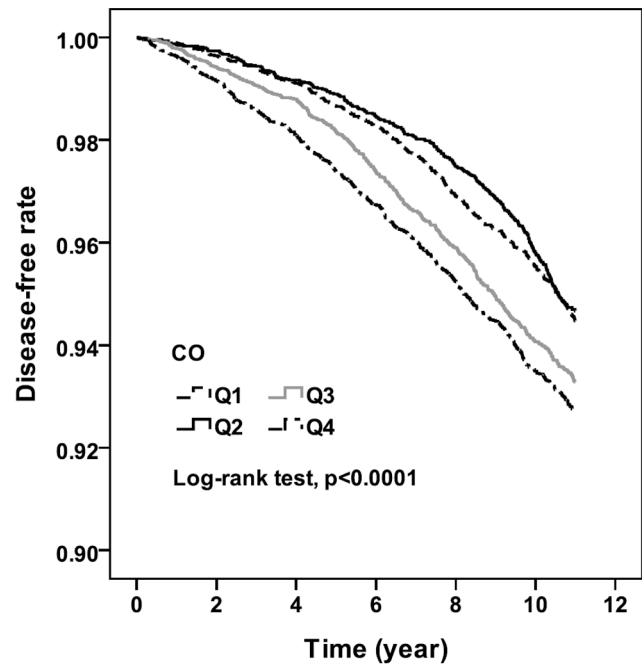

**Figure 2. Probability free of dementia among quartiles of yearly average concentration in CO.**  
doi:10.1371/journal.pone.0103078.g002

NHIRD are anonymous. Thus, relevant clinical variables, such as imaging results and pathology findings, were unavailable for the patient cases included in this study. Third, the participants were assigned to residential districts based on the clinic where they most frequently sought treatment for acute upper respiratory infection. Therefore, the resident who has no acute upper respiratory infection during study period had being excluded in this study. In our opinion, the resident without respiratory infection related medical record exposed to low level air pollutants. It might under the estimated risk of dementia. Nevertheless, the data on air pollutants and dementia diagnoses were reliable.

## Conclusions

Understanding the regional distribution of human health statuses can facilitate the investigation of the spread of diseases and the related risk factors as well as the assessment of medical resources and the planning of the use of these resources. In future

research, animal studies can be conducted to further examine the association between air pollutants and neurological disorders.

## Supporting Information

**Table S1 Adjusted hazard ratio for dementia and dementia-associated risk factors.**  
(DOCX)

## Author Contributions

Study concept and design: KHC CHK. Acquisition of data: KHC MYC CHM TNW CYC CHK. Analysis and interpretation of data: KHC CHM CHK. Drafting of the manuscript: KHC MYC CHM TNW CYC CHK. Critical revision of the manuscript for important intellectual content: KHC CHM CHK. Statistical analysis: CHM. Obtained funding: CHK. Administrative, technical, or material support: KHC MYC CHM TNW CYC CHK. Study supervision: CHK.

## References

- Dickey JH, Part VII (2000) Air pollution: overview of sources and health effects. *Dis Mon* 46:566–89.
- Lewtas J (2007) Air pollution combustion emissions: characterization of causative agents and mechanisms associated with cancer, reproductive, and cardiovascular effects. *Mutat Res* 636:95–133.
- Weuve J, Puett RC, Schwartz J, Yanosky JD, Laden F, et al. (2012) Exposure to particulate air pollution and cognitive decline in older women. *Arch Intern Med* 172:219–27.
- Srám RJ, Benes I, Binková B, Dejmeš J, Horstman D, et al. (1996) Teplice program—the impact of air pollution on human health. *Environ Health Perspect* 104 Suppl 4:699–714.
- Suglia SF, Gryparis A, Wright RO, Schwartz J, Wright RJ (2008) Association of black carbon with cognition among children in a prospective birth cohort study. *Am J Epidemiol* 167:280–6.
- Chen JC, Schwartz J (2009) Neurobehavioral effects of ambient air pollution on cognitive performance in US adults. *Neurotoxicology* 30:231–9.
- Ranft U, Schikowski T, Sugiri D, Krutmann J, Krämer U (2009) Long-term exposure to traffic-related particulate matter impairs cognitive function in the elderly. *Environ Res* 109:1004–11.
- Power MC, Weisskopf MG, Alexeeff SE, Coull BA, Spiro A 3rd, et al. (2011) Traffic-related air pollution and cognitive function in a cohort of older men. *Environ Health Perspect* 119:682–7.
- Lisabeth LD, Escobar JD, Dvonch JT, Sánchez BN, Majersik JJ, et al. (2008) Ambient air pollution and risk for ischemic stroke and transient ischemic attack. *Ann Neurol* 64:53–9.
- Migliore L, Coppèdè F (2009) Environmental-induced oxidative stress in neurodegenerative disorders and aging. *Mutat Res* 674:73–84.
- Turin TC, Kita Y, Rumana N, Nakamura Y, Ueda K, et al. (2012) Ambient air pollutants and acute case-fatality of cerebro-cardiovascular events: Takashima Stroke and AMI Registry, Japan (1988–2004). *Cerebrovasc Dis* 34(2):130–9.
- Andersen ZJ, Kristiansen LC, Andersen KK, Olsen TS, Hvidberg M, et al. (2012) Stroke and long-term exposure to outdoor air pollution from nitrogen dioxide: a cohort study. *Stroke* 43:320–5.
- Knopman DS (2007) Cerebrovascular disease and dementia. *Br J Radiol* 80 :S121–7.
- O'Brien JT (2006) Vascular cognitive impairment. *Am J Geriatr Psychiatry* 14:724–33.

15. Kokmen E, Whisnant JP, O'Fallon WM, Chu CP, Beard CM (1996) Dementia after ischemic stroke: a population-based study in Rochester, Minnesota (1960–1984). *Neurology* 46:154–9.
16. Morales E, Julvez J, Torrent M, de Cid R, Guxens M, et al. (2009) Association of early-life exposure to household gas appliances and indoor nitrogen dioxide with cognition and attention behavior in preschoolers. *Am J Epidemiol* 169:1327–36.
17. Freire C, Ramos R, Puertas R, Lopez-Espinosa MJ, Julvez J, et al. (2010) Association of traffic-related air pollution with cognitive development in children. *J Epidemiol Community Health* 64:223–8.
18. Clark C, Crombie R, Head J, van Kamp I, van Kempen E, et al. (2012) Does traffic-related air pollution explain associations of aircraft and road traffic noise exposure on children's health and cognition? A secondary analysis of the United Kingdom sample from the RANCH project. *Am J Epidemiol* 176:327–37.
19. Zhu N, Li H, Han M, Guo L, Chen L, et al. (2012) Environmental nitrogen dioxide (NO<sub>2</sub>) exposure influences development and progression of ischemic stroke. *Toxicol Lett* 214:120–30.
20. Li H, Xin X (2013) Nitrogen dioxide (NO<sub>2</sub>) pollution as a potential risk factor for developing vascular dementia and its synaptic mechanisms. *Chemosphere* 92:52–8.
21. Kummer MP, Hermes M, Delekarte A, Hammerschmidt T, Kumar S, et al. (2011) Nitration of tyrosine 10 critically enhances amyloid  $\beta$  aggregation and plaque formation. *Neuron* 71:833–44.
22. Gatto NM, Henderson VW, Hodis HN, St John JA, Lurmann F, et al. (2013) Components of air pollution and cognitive function in middle-aged and older adults in Los Angeles. *Neurotoxicology* 40C:1–7.
23. Blanco F, Alkorta I, Solimannejad M, Elguero J (2009) Theoretical study of the 1:1 complexes between carbon monoxide and hypohalous acids. *J Phys Chem A* 113:3237–44.
24. Roberts GP, Youn H, Kerby RL (2004) CO-sensing mechanisms. *Microbiol Mol Biol Rev* 68:453–73, table of contents.
25. Chen HL, Chen PC, Lu CH, Hsu NW, Chou KH, et al. (2013) Structural and cognitive deficits in chronic carbon monoxide intoxication: a voxel-based morphometry study. *BMC Neurol* 13:129.
26. Jung CR, Lin YT, Hwang BF (2013) Air pollution and newly diagnostic autism spectrum disorders: a population-based cohort study in Taiwan. *PLoS One* 8:e75510.
27. National Health Insurance Research Database (NHIRD): Introduction to the National Health Insurance Research Database (NHIRD), Taiwan (2010) Available: [http://w3.nhri.org.tw/nhird//date\\_01.html](http://w3.nhri.org.tw/nhird//date_01.html)
28. Taiwan Air Quality Monitoring Network in Taiwan Environmental Protection Administration. Available: <http://taqm.epa.gov.tw/taqm/en/PsiMap.aspx>
29. Li H, Xin X (2013) Nitrogen dioxide (NO<sub>2</sub>) pollution as a potential risk factor for developing vascular dementia and its synaptic mechanisms. *Chemosphere* 92:52–8.
30. Hopkins RO, Weaver LK, Valentine KJ, Mower C, Churchill S, et al. (2007) Apolipoprotein E genotype and response of carbon monoxide poisoning to hyperbaric oxygen treatment. *Am J Respir Crit Care Med* 176: 1001–6.
31. Garibaldi RA (1985) Epidemiology of community-acquired respiratory tract infections in adults. Incidence, etiology, and impact. *Am J Med* 78:32–7.
32. Kuo SS, Chang RE (2010) Geographical analysis of ESRD incidence and environment [Dissertation]. Taipei: Graduate Institute of Health Care Organization Administration, National Taiwan University. [In Chinese: English abstract]
33. Ministry of the Interior, R.O.C. (Taiwan). Monthly bulletin of interior statistics. Available at: <http://sowf.moi.gov.tw/stat/month/list.htm>. Accessed 2011 March 3. [In Chinese: English abstract]
34. Cataldo JK, Prochaska JJ, Glantz SA (2010) Cigarette smoking is a risk factor for Alzheimer's Disease: an analysis controlling for tobacco industry affiliation. *J Alzheimers Dis* 19:465–80.
35. Deng J, Shen C, Wang YJ, Zhang M, Li J, et al. (2010) Nicotine exacerbates tau phosphorylation and cognitive impairment induced by amyloid-beta 25–35 in rats. *Eur J Pharmacol* 637:83–8.
36. Oddo S, Caccamo A, Green KN, Liang K, Tran L, et al. (2005) Chronic nicotine administration exacerbates tau pathology in a transgenic model of Alzheimer's disease. *Proc Natl Acad Sci U S A* 102:3046–51.
37. Juan D, Zhou DH, Li J, Wang JY, Gao C, et al. (2004) A 2-year follow-up study of cigarette smoking and risk of dementia. *Eur J Neurol* 11:277–82.
38. Peters R, Peters J, Warner J, Beckett N, Bulpitt C (2008) Alcohol, dementia and cognitive decline in the elderly: a systematic review. *Age Ageing* 37:505–12.
39. Deng J, Zhou DH, Li J, Wang YJ, Gao C, et al. (2006) A 2-year follow-up study of alcohol consumption and risk of dementia. *Clin Neurol Neurosurg* 108:378–83.
40. Anstey KJ, Mack HA, Cherbuin N (2009) Alcohol consumption as a risk factor for dementia and cognitive decline: meta-analysis of prospective studies. *Am J Geriatr Psychiatry* 17:542–55.
41. Pauwels RA, Rabe KF (2004) Burden and clinical features of chronic obstructive pulmonary disease (COPD). *Lancet* 364:613–20.
42. Patel BD, Loo WJ, Tasker AD, Screation NJ, Burrows NP, et al. (2006) Smoking related COPD and facial wrinkling: is there a common susceptibility? *Thorax* 61:568–571.
43. Enoch MA, Goldman D (2002) Problem drinking and alcoholism: diagnosis and treatment. *Am Fam Physician* 65:441–8.
44. Liang CY, Chou TM, Ho PS, Shieh TY, Yang YH (2004) Prevalence Rates of Alcohol Drinking in Taiwan. *Taiwan Journal of Oral Medicine & Health Sciences* 20:91–104
45. Chuang YC, Chuang KY (2008) Gender differences in relationships between social capital and individual smoking and drinking behavior in Taiwan. *Soc Sci Med* 67:1321–30.
46. Chang KH, Chung CJ, Lin CL, Sung FC, Wu TN, et al. (2014) Increased risk of dementia in patients with osteoporosis: a population-based retrospective cohort analysis. *Age (Dordr)* 36:967–75.
47. Liu C, Hung Y, Chuang Y, Chen Y, Weng W, et al. (2006) Incorporating development stratification of Taiwan townships into sampling design of large scale health interview survey. *Journal of Health Management* 4:1–22 [in Chinese].
48. Chiang PH, Chang YC, Lin JD, Tung HJ, Lin LP, et al. (2013) Healthcare utilization and expenditure analysis between individuals with intellectual disabilities and the general population in Taiwan: a population-based nationwide child and adolescent study. *Res Dev Disabil* 34:2485–92.
49. Lin YJ, Tian WH, Chen CC (2011) Urbanization and the utilization of outpatient services under National Health Insurance in Taiwan. *Health Policy* 103:236–43.
50. Lin HC, Lin YJ, Liu TC, Chen CS, Lin CC (2007) Urbanization and place of death for the elderly: a 10-year population-based study. *Palliat Med* 21:705–11.
